# Supplementary material
Source: publisher figshare collection journal article supplement (https://gsajournals.figshare.com/ndownloader/files/14086091)
Supplement: Supplementary file 1 [file 14086091]

## Sheet: PT Phasi degradome targets
Supplementary Table 4. PhaseTank output of degradome TAS loci targets and miRNA/phasi-RNA trigger predictions.
# CleaveLand4 4.3
# Sat Apr 1 16:57:32 CDT 2017
# Degradome Density File: Pantaleo-degradome-trim-discard19-TEsrt.fa_dd.txt
# Query Alignment file: siRNAs.fa_GSTAr.txt
# Transcriptome: TAS_gene.fa
# P-value cutoff: 1
# Category cutoff: 4
# Output Format: Tabular
SiteID	Query	Transcript	TStart	TStop	TSlice	MFEperfect	MFEsite	MFEratio	AllenScore	Paired	Unpaired	Structure; 5'target & 5' miRNA	Sequence	DegradomeCategory	DegradomePval	annotation
NC_012019.3_Vitis_vinifera_cultivar_PN40024_chromosome_13,_12X,_whole_genome_shotgun_sequence_342_1:82	vvi-MIR482_Cluster_32524_NC_012023.3_Vitis_vinifera_cultivar_PN40024_chromosome_17,_12X,_whole_genome_shotgun_sequence:5522830-5523995	potential TAS locus but no good targets. NC_012019.3_Vitis_vinifera_cultivar_PN40024_chromosome_13,_12X,_whole_genome_shotgun_sequence_342_1	70	91	82	-41.7	-37.7	0.904077	3	1-13,91-79;15-22,77-70	14-14,78-78[SIL]	((((((((.(((((((((((((&))))))))))))).))))))))	GGAAUGGGUGGGGUGGGAAAGA&UCUUUCCUACUCCUCCCAUUCC	0	0.00035989	candidate TAS locus, but no good siRNAs with targets
NC_012024.3_Vitis_vinifera_cultivar_PN40024_chromosome_18,_12X,_whole_genome_shotgun_sequence_229_1:82	vvi-MIR482_Cluster_32524_NC_012023.3_Vitis_vinifera_cultivar_PN40024_chromosome_17,_12X,_whole_genome_shotgun_sequence:5522830-5523995	Vv-slyTAS5-like. NC_012024.3_Vitis_vinifera_cultivar_PN40024_chromosome_18,_12X,_whole_genome_shotgun_sequence_229_1	70	91	82	-41.7	-35.6	0.853717	2	1-16,91-76;18-22,74-70	17-17,75-75[SIL]	(((((.((((((((((((((((&)))))))))))))))).)))))	GGAAUAGGAGGGGUAGGAAAGA&UCUUUCCUACUCCUCCCAUUCC	2	0.00688491	Vv-slyTAS5-like TAS locus; at least one siRNA D12(-) targets NB-ARC LRR. Not homologous to sly-TAS5. siRNAs from 3' coding and UTR of uncharacterized predicted 83 aa transmembrane peptide VIT_18s0072g01090
VIT_18s0072g01090.t01_cdna_chromosome:IGGP_12x:18:20663924:20666589:1_gene:VIT_18s0072g01090_gene_biotype:protein_coding_transcript_biotype:protein_coding_description:Putative_uncharacterized_protein__[Source:TniProtKB/TrEMBL;Acc:F6GY05]:413	D8(-)self NC_012024.3_Vitis_vinifera_cultivar_PN40024_chromosome_18,_12X,_whole_genome_shotgun_sequence_229_247(-)	VIT_18s0072g01090.t01_cdna_chromosome:IGGP_12x:18:20663924:20666589:1_gene:VIT_18s0072g01090_gene_biotype:protein_coding_transcript_biotype:protein_coding_description:Putative_uncharacterized_protein__[Source:TniProtKB/TrEMBL;Acc:F6GY05]	402	422	413	-26.9	-28	1	0	1-21,422-402	NA	(((((((((((((((((((((&)))))))))))))))))))))	UUAAAGUAUUACCGUUAUGAU&AUCAUAACGGUAAUACUUUAA	4	0.0148565	siRNA from 3' coding and UTR of uncharacterized predicted 83 aa transmembrane peptide. Evidence of slicing for new register?
VIT_18s0072g01090.t01_cdna_chromosome:IGGP_12x:18:20663924:20666589:1_gene:VIT_18s0072g01090_gene_biotype:protein_coding_transcript_biotype:protein_coding_description:Putative_uncharacterized_protein__[Source:TniProtKB/TrEMBL;Acc:F6GY05]:948	D30(-) NC_012024.3_Vitis_vinifera_cultivar_PN40024_chromosome_18,_12X,_whole_genome_shotgun_sequence_229_709(-)	VIT_18s0072g01090.t01_cdna_chromosome:IGGP_12x:18:20663924:20666589:1_gene:VIT_18s0072g01090_gene_biotype:protein_coding_transcript_biotype:protein_coding_description:Putative_uncharacterized_protein__[Source:TniProtKB/TrEMBL;Acc:F6GY05]	937	957	948	-37.6	-32.2	0.856383	1	1-13,957-945;15-21,943-937	14-14,944-944[SIL]	(((((((.(((((((((((((&))))))))))))).)))))))	AAAGCCUAGCAAGUUGUGCAU&AUGCACAACUUGCCAGGCUUU	4	0.0294923	siRNA from 3' coding and UTR of uncharacterized predicted 83 aa transmembrane peptide. Evidence of slicing for new register?
VIT_00s0238g00130.t01_cdna_chromosome:IGGP_12x:Tn:16302912:16307046:-1_gene:VIT_00s0238g00130_gene_biotype:protein_coding_transcript_biotype:protein_coding_description:Putative_uncharacterized_protein__[Source:TniProtKB/TrEMBL;Acc:F6I7C7]:1136	D12(-) NC_012024.3_Vitis_vinifera_cultivar_PN40024_chromosome_18,_12X,_whole_genome_shotgun_sequence_229_310(-)	VIT_00s0238g00130.t01_cdna_chromosome:IGGP_12x:Tn:16302912:16307046:-1_gene:VIT_00s0238g00130_gene_biotype:protein_coding_transcript_biotype:protein_coding_description:Putative_uncharacterized_protein__[Source:TniProtKB/TrEMBL;Acc:F6I7C7]	1125	1145	1136	-36.4	-31	0.851648	2	1-17,1145-1129;19-21,1127-1125	18-18,1128-1128[SIL]	(((.(((((((((((((((((&))))))))))))))))).)))	AGGGCUUCCAUUAGUUCUUAA&UUAAGAGCUAAUGGAAGGCCU	3	0.0380661	NB-ARC; target of chr18_229 D12(-)
VIT_18s0122g00970.t01_cdna_chromosome:IGGP_12x:18:686144:690657:1_gene:VIT_18s0122g00970_gene_biotype:protein_coding_transcript_biotype:protein_coding_gene_symbol:ATIRE1-1_description:Putative_uncharacterized_protein__[Source:TniProtKB/TrEMBL;Acc:F6I6T5]:1667	D12(-) NC_012024.3_Vitis_vinifera_cultivar_PN40024_chromosome_18,_12X,_whole_genome_shotgun_sequence_229_310(-)	VIT_18s0122g00970.t01_cdna_chromosome:IGGP_12x:18:686144:690657:1_gene:VIT_18s0122g00970_gene_biotype:protein_coding_transcript_biotype:protein_coding_gene_symbol:ATIRE1-1_description:Putative_uncharacterized_protein__[Source:TniProtKB/TrEMBL;Acc:F6I6T5]	1656	1676	1667	-36.4	-24.8	0.681319	6	1-4,1676-1673;6-10,1671-1667;12-15,1665-1662;17-20,1660-1657	5-5,1672-1672[SIL];11-11,1666-1666[SIL];16-16,1661-1661[SIL];21-21,1656-1656[UP3]	.((((.((((.(((((.((((&)))).))))).)))).)))).	UGGCCGUCCAGUAGCUGUUAA&UUAAGAGCUAAUGGAAGGCCU	1	0.0486533	44% homol to INOSITOL REQUIRING 1-1 IRE1B/AT5G24360 catalyze bZIP60 mRNA splicing in unfolded protein response/autophagy; D11(-) questionable Allen score
VIT_13s0019g03540.t01_cdna_chromosome:IGGP_12x:13:4667703:4712639:1_gene:VIT_13s0019g03540_gene_biotype:protein_coding_transcript_biotype:protein_coding_description:Putative_uncharacterized_protein__[Source:TniProtKB/TrEMBL;Acc:F6HNK8]:3652	D6(+) NC_012024.3_Vitis_vinifera_cultivar_PN40024_chromosome_18,_12X,_whole_genome_shotgun_sequence_229_186(+)	VIT_13s0019g03540.t01_cdna_chromosome:IGGP_12x:13:4667703:4712639:1_gene:VIT_13s0019g03540_gene_biotype:protein_coding_transcript_biotype:protein_coding_description:Putative_uncharacterized_protein__[Source:TniProtKB/TrEMBL;Acc:F6HNK8]	3641	3660	3652	-37.3	-29.2	0.782842	3.5	1-5,3660-3656;7-14,3655-3648;16-21,3646-3641	6-6,x-x[BULq];15-15,3647-3647[SIL]	((((((.((((((((-(((((&))))).)))))))).))))))	GUCAUCGGCAUCAUC-AGAAC&GUUCUCGAUGAUGUGGAUGAC	4	0.0581148	Armadillo-type fold domain, found in nuclear cap-binding protein CBP80 and LRR variants; 72% homol to regulator of nonsense transcripts UPF2/AT2G39260
VIT_07s0031g00350.t01_cdna_chromosome:IGGP_12x:7:16584261:16585899:-1_gene:VIT_07s0031g00350_gene_biotype:protein_coding_transcript_biotype:protein_coding_description:Putative_uncharacterized_protein__[Source:TniProtKB/TrEMBL;Acc:D7SVV2]:421	D6(+) NC_012024.3_Vitis_vinifera_cultivar_PN40024_chromosome_18,_12X,_whole_genome_shotgun_sequence_229_186(+)	VIT_07s0031g00350.t01_cdna_chromosome:IGGP_12x:7:16584261:16585899:-1_gene:VIT_07s0031g00350_gene_biotype:protein_coding_transcript_biotype:protein_coding_description:Putative_uncharacterized_protein__[Source:TniProtKB/TrEMBL;Acc:D7SVV2]	411	430	421	-37.3	-25.2	0.675603	3	2-12,429-419;14-17,418-415;19-21,413-411	1-1,430-430[UP5];13-13,x-x[BULq];18-18,414-414[SIL]	(((.((((-(((((((((((.&.))))))))))).)))).)))	GUCUUCCA-AUCAUCGAGAAA&GUUCUCGAUGAUGUGGAUGAC	2	0.479073	SAM-dependent_MTase ;
NC_012019.3_Vitis_vinifera_cultivar_PN40024_chromosome_13,_12X,_whole_genome_shotgun_sequence_229_2:94	vvi-MIR482_Cluster_32524_NC_012023.3_Vitis_vinifera_cultivar_PN40024_chromosome_17,_12X,_whole_genome_shotgun_sequence:5522830-5523995	TAS11. NC_012019.3_Vitis_vinifera_cultivar_PN40024_chromosome_13,_12X,_whole_genome_shotgun_sequence_229_2	82	103	94	-41.7	-29.6	0.709832	5	1-4,103-100;6-7,98-97;9-13,95-91;15-22,89-82	5-5,99-99[SIL];8-8,96-96[SIL];14-14,90-90[SIL]	((((((((.(((((.((.((((&)))).)).))))).))))))))	GGAAUGGGUGGAGUUGGUAAGA&UCUUUCCUACUCCUCCCAUUCC	3	0.0680227	candidate TAS locus; not great Allen score, yet siRNAs go on to other phasi loci
VIT_18s0001g10620.t01_cdna_chromosome:IGGP_12x:18:8941786:8944739:1_gene:VIT_18s0001g10620_gene_biotype:protein_coding_transcript_biotype:protein_coding_description:Putative_uncharacterized_protein__[Source:TniProtKB/TrEMBL;Acc:F6GZZ9]:256	D3(+) NC_012019.3_Vitis_vinifera_cultivar_PN40024_chromosome_13,_12X,_whole_genome_shotgun_sequence_229_703(-)	VIT_18s0001g10620.t01_cdna_chromosome:IGGP_12x:18:8941786:8944739:1_gene:VIT_18s0001g10620_gene_biotype:protein_coding_transcript_biotype:protein_coding_description:Putative_uncharacterized_protein__[Source:TniProtKB/TrEMBL;Acc:F6GZZ9]	245	265	256	-30.5	-24.6	0.806557	8.5	3-18,263-248	1-2,265-264[UP5];19-21,247-245[UP3]	...((((((((((((((((..&..))))))))))))))))...	GGAGAGCAAUGGGCAAAGCUG&AUGCUUUGCUUAUUGUUCAAC	2	0.037635	EF_Hand_1_Ca_BS
VIT_02s0025g01340.t01_cdna_chromosome:IGGP_12x:2:1261182:1263747:-1_gene:VIT_02s0025g01340_gene_biotype:protein_coding_transcript_biotype:protein_coding_description:Putative_uncharacterized_protein__[Source:TniProtKB/TrEMBL;Acc:D7TVE7]:177	D4(-) NC_012019.3_Vitis_vinifera_cultivar_PN40024_chromosome_13,_12X,_whole_genome_shotgun_sequence_229_684(+)	VIT_02s0025g01340.t01_cdna_chromosome:IGGP_12x:2:1261182:1263747:-1_gene:VIT_02s0025g01340_gene_biotype:protein_coding_transcript_biotype:protein_coding_description:Putative_uncharacterized_protein__[Source:TniProtKB/TrEMBL;Acc:D7TVE7]	166	186	177	-34.6	-27.5	0.794798	7	2-10,185-177;13-20,174-167	1-1,186-186[UP5];11-12,176-175[SIL];21-21,166-166[UP3]	.((((((((..(((((((((.&.)))))))))..)))))))).	CCGUCGGAUUUAGGGUUAUGG&GUAUAACCCUUUAUCCGACGU	4	0.0294923	START domain PYL9/AT1G01360 76% homol
VIT_18s0001g07270.t01_cdna_chromosome:IGGP_12x:18:5499153:5501603:-1_gene:VIT_18s0001g07270_gene_biotype:protein_coding_transcript_biotype:protein_coding_description:Putative_uncharacterized_protein__[Source:TniProtKB/TrEMBL;Acc:F6H115]:1830	D3(-) NC_012019.3_Vitis_vinifera_cultivar_PN40024_chromosome_13,_12X,_whole_genome_shotgun_sequence_229_705(+)	VIT_18s0001g07270.t01_cdna_chromosome:IGGP_12x:18:5499153:5501603:-1_gene:VIT_18s0001g07270_gene_biotype:protein_coding_transcript_biotype:protein_coding_description:Putative_uncharacterized_protein__[Source:TniProtKB/TrEMBL;Acc:F6H115]	1819	1839	1830	-30.4	-22.1	0.726974	4	1-6,1839-1834;8-18,1832-1822;20-21,1820-1819	7-7,1833-1833[SIL];19-19,1821-1821[SIL]	((.(((((((((((.((((((&)))))).))))))))))).))	CGUUGUUUUGCUUACUGUUCA&UGAACAAUAAGCAAAGCAUUG	4	0.458649	NB-ARC, 71 paralogues
VIT_05s0020g04430.t01_cdna_chromosome:IGGP_12x:5:6219079:6221684:-1_gene:VIT_05s0020g04430_gene_biotype:protein_coding_transcript_biotype:protein_coding_description:Putative_uncharacterized_protein__[Source:TniProtKB/TrEMBL;Acc:F6HDV7]:516	NC_012024.3_Vitis_vinifera_cultivar_PN40024_chromosome_18,_12X,_whole_genome_shotgun_sequence_68_1160(-) D27(+)	VIT_05s0020g04430.t01_cdna_chromosome:IGGP_12x:5:6219079:6221684:-1_gene:VIT_05s0020g04430_gene_biotype:protein_coding_transcript_biotype:protein_coding_description:Putative_uncharacterized_protein__[Source:TniProtKB/TrEMBL;Acc:F6HDV7]	504	525	516	-32.5	-23.9	0.735385	5.5	2-6,524-520;8-16,518-510;17-21,508-504	1-1,525-525[UP5];7-7,519-519[SIL];x-x,509-509[BULt]	(((((.(((((((((.(((((.&.))))).)))))))))-)))))	CGGGGUCCGAUUUCCCUAAGAG&UUCUUAAGGAAAUCGG-UUCUG	3	0.05043	65% homol to VTE3/AT3G63410 SAM-dependent_MTases, chloroplast inner envelope. MT lacks plastoquinone.
NC_012020.3_Vitis_vinifera_cultivar_PN40024_chromosome_14,_12X,_whole_genome_shotgun_sequence_332_1:83	vvi-MIR828_Cluster_31813_NC_012022.3_Vitis_vinifera_cultivar_PN40024_chromosome_16,_12X,_whole_genome_shotgun_sequence:21724236-21724615	NC_012020.3_Vitis_vinifera_cultivar_PN40024_chromosome_14,_12X,_whole_genome_shotgun_sequence_332_1	71	92	83	-35.2	-32.7	0.928977	2	1-10,92-83;12-22,81-71	11-11,82-82[SIL]	(((((((((((.((((((((((&)))))))))).)))))))))))	UGGAAUACUCACUUGAGCAAGA&UCUUGCUCAAAUGAGUAUUCCA	3	0.0127268	TAS4a
VIT_09s0018g01290.t01_cdna_chromosome:IGGP_12x:9:18239391:18241470:1_gene:VIT_09s0018g01290_gene_biotype:protein_coding_transcript_biotype:protein_coding_description:Putative_uncharacterized_protein__[Source:TniProtKB/TrEMBL;Acc:D7T407]:375	TAS4c D3(-) NC_012007.3_Vitis_vinifera_cultivar_PN40024_chromosome_1,_12X,_whole_genome_shotgun_sequence_54_354(+)	VIT_09s0018g01290.t01_cdna_chromosome:IGGP_12x:9:18239391:18241470:1_gene:VIT_09s0018g01290_gene_biotype:protein_coding_transcript_biotype:protein_coding_description:Putative_uncharacterized_protein__[Source:TniProtKB/TrEMBL;Acc:D7T407]	364	384	375	-38.8	-28.9	0.744845	4	1-12,384-373;14-20,371-365	13-13,372-372[SIL];21-21,364-364[UP3]	.(((((((.((((((((((((&)))))))))))).))))))).	AAUGGUGGAGGGCUGUUGAAG&CUUCAACAGCUCACUACCGUC	2	0.0797561	target of TAS4c3'D3(-), unknown 93aa peptide, conserved in plants
VIT_14s0006g01280.t01_cdna_chromosome:IGGP_12x:14:16642727:16645352:1_gene:VIT_14s0006g01280_gene_biotype:protein_coding_transcript_biotype:protein_coding_description:Putative_uncharacterized_protein__[Source:TniProtKB/TrEMBL;Acc:F6HSK4]:397	TAS4b D4(-) NC_012020.3_Vitis_vinifera_cultivar_PN40024_chromosome_14,_12X,_whole_genome_shotgun_sequence_331_142(-)	MYBA7 VIT_14s0006g01280.t01_cdna_chromosome:IGGP_12x:14:16642727:16645352:1_gene:VIT_14s0006g01280_gene_biotype:protein_coding_transcript_biotype:protein_coding_description:Putative_uncharacterized_protein__[Source:TniProtKB/TrEMBL;Acc:F6HSK4]	386	406	397	-42.7	-36.6	0.857143	3	1-13,406-394;16-20,391-387	14-15,393-392[SIL];21-21,386-386[UP3]	.(((((..(((((((((((((&)))))))))))))..))))).	GGCCUCGUCCUCGGACCUUCA&UGAAGGUCCGAGGUAGAGGCA	0	0.00303051	MYBA7 degradome evidence of target of TAS4b-3'D4(-)
NC_012015.3_Vitis_vinifera_cultivar_PN40024_chromosome_9,_12X,_whole_genome_shotgun_sequence_12_1:129	vvi-MIR828_Cluster_31813_NC_012022.3_Vitis_vinifera_cultivar_PN40024_chromosome_16,_12X,_whole_genome_shotgun_sequence:21724236-21724615	VIT_09s0002g01380; NC_012015.3_Vitis_vinifera_cultivar_PN40024_chromosome_9,_12X,_whole_genome_shotgun_sequence_12_1	117	138	129	-35.2	-32	0.909091	1	1-15,138-124;17-22,122-117	16-16,123-123[SIL]	((((((.(((((((((((((((&))))))))))))))).))))))	UGGAAUUCUCAUUUGAGCAAGA&UCUUGCUCAAAUGAGUAUUCCA	2	0.0137224	MYB; Pantaleo_2010_degradome_1200reads_majsp_D3plus
NC_012023.3_Vitis_vinifera_cultivar_PN40024_chromosome_17,_12X,_whole_genome_shotgun_sequence_164_2:71	vvi-MIR828_Cluster_31813_NC_012022.3_Vitis_vinifera_cultivar_PN40024_chromosome_16,_12X,_whole_genome_shotgun_sequence:21724236-21724615	NC_012023.3_Vitis_vinifera_cultivar_PN40024_chromosome_17,_12X,_whole_genome_shotgun_sequence_164_2	59	80	71	-35.2	-28.1	0.798295	4	3-16,78-65;18-22,63-59	1-2,80-79[UP5];17-17,64-64[SIL]	(((((.((((((((((((((..&..)))))))))))))).)))))	UGGAACACUCAUUUGAGCAAAA&UCUUGCUCAAAUGAGUAUUCCA	0	0.0021574	MYB; Pantaleo_2010_degradome_5440reads_VIT_17s0000g08480
VIT_17s0000g08480.t01_cdna_chromosome:IGGP_12x:17:9703427:9704324:-1_gene:VIT_17s0000g08480_gene_biotype:protein_coding_transcript_biotype:protein_coding_description:Putative_uncharacterized_protein__[Source:TniProtKB/TrEMBL;Acc:D7SHR3]:412	self NC_012023.3_Vitis_vinifera_cultivar_PN40024_chromosome_17,_12X,_whole_genome_shotgun_sequence_164_310(+)=D5(-)	VIT_17s0000g08480.t01_cdna_chromosome:IGGP_12x:17:9703427:9704324:-1_gene:VIT_17s0000g08480_gene_biotype:protein_coding_transcript_biotype:protein_coding_description:Putative_uncharacterized_protein__[Source:TniProtKB/TrEMBL;Acc:D7SHR3]	401	421	412	-37.3	-39.2	1	0	1-21,421-401	NA	(((((((((((((((((((((&)))))))))))))))))))))	CUCACAGUAUGCCAUCAAACC&GGUUUGAUGGCAUACUGUGAG	2	0.00637319	MYB; Pantaleo_2010_degradome_5440reads_VIT_17s0000g08480
VIT_17s0000g08480.t01_cdna_chromosome:IGGP_12x:17:9703427:9704324:-1_gene:VIT_17s0000g08480_gene_biotype:protein_coding_transcript_biotype:protein_coding_description:Putative_uncharacterized_protein__[Source:TniProtKB/TrEMBL;Acc:D7SHR3]:433	self NC_012023.3_Vitis_vinifera_cultivar_PN40024_chromosome_17,_12X,_whole_genome_shotgun_sequence_164_289(+)=D6(-)	VIT_17s0000g08480.t01_cdna_chromosome:IGGP_12x:17:9703427:9704324:-1_gene:VIT_17s0000g08480_gene_biotype:protein_coding_transcript_biotype:protein_coding_description:Putative_uncharacterized_protein__[Source:TniProtKB/TrEMBL;Acc:D7SHR3]	422	442	433	-34.8	-36.6	1	0	1-21,442-422	NA	(((((((((((((((((((((&)))))))))))))))))))))	CAGAUUCUAAACCACCUUCAG&CUGAAGGUGGUUUAGAAUCUG	4	0.0148565	MYB; Pantaleo_2010_degradome_5440reads_VIT_17s0000g08480
VIT_14s0066g01220.t01_cdna_chromosome:IGGP_12x:14:27708124:27709246:-1_gene:VIT_14s0066g01220_gene_biotype:protein_coding_transcript_biotype:protein_coding_description:Putative_uncharacterized_protein__[Source:TniProtKB/TrEMBL;Acc:F6HTZ4]:370	self NC_012020.3_Vitis_vinifera_cultivar_PN40024_chromosome_14,_12X,_whole_genome_shotgun_sequence_397_81592(+) =D3(-)	VIT_14s0066g01220.t01_cdna_chromosome:IGGP_12x:14:27708124:27709246:-1_gene:VIT_14s0066g01220_gene_biotype:protein_coding_transcript_biotype:protein_coding_description:Putative_uncharacterized_protein__[Source:TniProtKB/TrEMBL;Acc:F6HTZ4]	359	379	370	-29.4	-31	1	0	1-21,379-359	NA	(((((((((((((((((((((&)))))))))))))))))))))	CUAAUGUAUCUUCAACUCUAA&UUAGAGUUGAAGAUACAUUAG	4	0.0148565	MYB156-like; Pantaleo_2010_degradome_5669reads_VIT_14s0066g01220
VIT_14s0066g01220.t01_cdna_chromosome:IGGP_12x:14:27708124:27709246:-1_gene:VIT_14s0066g01220_gene_biotype:protein_coding_transcript_biotype:protein_coding_description:Putative_uncharacterized_protein__[Source:TniProtKB/TrEMBL;Acc:F6HTZ4]:412	self NC_012020.3_Vitis_vinifera_cultivar_PN40024_chromosome_14,_12X,_whole_genome_shotgun_sequence_397_81550(+)= D5(-)	VIT_14s0066g01220.t01_cdna_chromosome:IGGP_12x:14:27708124:27709246:-1_gene:VIT_14s0066g01220_gene_biotype:protein_coding_transcript_biotype:protein_coding_description:Putative_uncharacterized_protein__[Source:TniProtKB/TrEMBL;Acc:F6HTZ4]	401	421	412	-40.5	-42	1	0	1-21,421-401	NA	(((((((((((((((((((((&)))))))))))))))))))))	AAGGAUCCGAGCCACUCAUGA&UCAUGAGUGGCUCGGAUCCUU	4	0.0148565	MYB156-like; Pantaleo_2010_degradome_5669reads_VIT_14s0066g01220
NC_012020.3_Vitis_vinifera_cultivar_PN40024_chromosome_14,_12X,_whole_genome_shotgun_sequence_126_1:82	vvi-miR7122_Cluster_8708_NC_012011.3_Vitis_vinifera_cultivar_PN40024_chromosome_5,_12X,_whole_genome_shotgun_sequence:6820608-6821071	NC_012020.3_Vitis_vinifera_cultivar_PN40024_chromosome_14,_12X,_whole_genome_shotgun_sequence_126_1	70	91	82	-40.9	-28.2	0.689487	4	1-7,91-85;9-22,83-70	8-8,84-84[SIL]	((((((((((((((.(((((((&))))))).))))))))))))))	CUAUCGUCAUUUCUAUGUGUAA&UUACACAGAGAGAUGACGGUGG	3	0.0063838	Candidate TAS locus; VIT_14s0081g00100 ~1200 nt downstream on opposite strand of grape EST encoding 57 aa peptide.
NC_012011.3_Vitis_vinifera_cultivar_PN40024_chromosome_5,_12X,_whole_genome_shotgun_sequence_11_2:339	D5(-) TAS3 self NC_012011.3_Vitis_vinifera_cultivar_PN40024_chromosome_5,_12X,_whole_genome_shotgun_sequence_11_234(+)	NC_012011.3_Vitis_vinifera_cultivar_PN40024_chromosome_5,_12X,_whole_genome_shotgun_sequence_11_2	328	348	339	-32.4	-33.4	1	0	1-21,348-328	NA	(((((((((((((((((((((&)))))))))))))))))))))	CGUUUUCCAUCUUGUCAUGAA&UUCAUGACAAGAUGGAAAACG	2	0.0034484
NC_012011.3_Vitis_vinifera_cultivar_PN40024_chromosome_5,_12X,_whole_genome_shotgun_sequence_11_2:360	D4(-) TAS3 self NC_012011.3_Vitis_vinifera_cultivar_PN40024_chromosome_5,_12X,_whole_genome_shotgun_sequence_11_213(+)	NC_012011.3_Vitis_vinifera_cultivar_PN40024_chromosome_5,_12X,_whole_genome_shotgun_sequence_11_2	349	369	360	-40	-41.7	1	0	1-21,369-349	NA	(((((((((((((((((((((&)))))))))))))))))))))	CUCUAUACCAGCACCGACUGA&UCAGUCGGUGCUGGUAUAGAG	2	0.0034484
NC_012011.3_Vitis_vinifera_cultivar_PN40024_chromosome_5,_12X,_whole_genome_shotgun_sequence_11_2:402	D2(-) TAS3 self NC_012011.3_Vitis_vinifera_cultivar_PN40024_chromosome_5,_12X,_whole_genome_shotgun_sequence_11_171(+)	NC_012011.3_Vitis_vinifera_cultivar_PN40024_chromosome_5,_12X,_whole_genome_shotgun_sequence_11_2	391	411	402	-43.5	-44.8	1	0	1-21,411-391	NA	(((((((((((((((((((((&)))))))))))))))))))))	UCCCCGUUUCCGCCCAACUCA&UGAGUUGGGCGGAAACGGGGA	2	0.0034484
VIT_06s0004g03130.t01_cdna_chromosome:IGGP_12x:6:3879617:3888296:1_gene:VIT_06s0004g03130_gene_biotype:protein_coding_transcript_biotype:protein_coding_gene_symbol:ARF4_description:Putative_uncharacterized_protein__[Source:TniProtKB/TrEMBL;Acc:D7SKV9]:1760	D7(+) TAS3 NC_012011.3_Vitis_vinifera_cultivar_PN40024_chromosome_5,_12X,_whole_genome_shotgun_sequence_11_274(-)	VIT_06s0004g03130.t01_cdna_chromosome:IGGP_12x:6:3879617:3888296:1_gene:VIT_06s0004g03130_gene_biotype:protein_coding_transcript_biotype:protein_coding_gene_symbol:ARF4_description:Putative_uncharacterized_protein__[Source:TniProtKB/TrEMBL;Acc:D7SKV9]	1749	1769	1760	-36.2	-33	0.911602	2.5	1-19,1769-1751	20-21,1750-1749[UP3]	..(((((((((((((((((((&)))))))))))))))))))..	AAGGUCUUGCAAGGUCAAGAA&UUCUUGACCUUGUAAGACCCU	4	0.072108
NC_012013.3_Vitis_vinifera_cultivar_PN40024_chromosome_7,_12X,_whole_genome_shotgun_sequence_40_1:82	vvi-MIR393a_Cluster_31361_NC_012022.3_Vitis_vinifera_cultivar_PN40024_chromosome_16,_12X,_whole_genome_shotgun_sequence:17247181-17247375	TIR1-like VIT_07s0104g01320. NC_012013.3_Vitis_vinifera_cultivar_PN40024_chromosome_7,_12X,_whole_genome_shotgun_sequence_40_1	71	91	82	-39.1	-34.5	0.882353	2	1-18,91-74;20-21,73-72	19-19,x-x[BULq];22-22,71-71[UP3]	.((-((((((((((((((((((&)))))))))))))))))).)).	AGA-CAAUGCGAUCCCUUUGGA&UCCAAAGGGAUCGCAUUGAUCA	2	0.00688491
VIT_16s0050g00440.t01_cdna_chromosome:IGGP_12x:16:17245485:17247362:-1_gene:VIT_16s0050g00440_gene_biotype:protein_coding_transcript_biotype:protein_coding_description:Putative_uncharacterized_protein__[Source:TniProtKB/TrEMBL;Acc:E0CV21]:61	D1(+) NC_012013.3_Vitis_vinifera_cultivar_PN40024_chromosome_7,_12X,_whole_genome_shotgun_sequence_40_81(+)	VIT_16s0050g00440.t01_cdna_chromosome:IGGP_12x:16:17245485:17247362:-1_gene:VIT_16s0050g00440_gene_biotype:protein_coding_transcript_biotype:protein_coding_description:Putative_uncharacterized_protein__[Source:TniProtKB/TrEMBL;Acc:E0CV21]	48	70	61	-37.8	-30	0.793651	6	1-10,70-61;11-15,58-54;17-21,52-48	x-x,60-59[BULt];16-16,53-53[SIL]	(((((.(((((..((((((((((&))))))))))--))))).)))))	GCAGGUGGACAGUUCCAAAGGGA&UCCCUUUGGA--UGUCUUCUUGC	0	0.00375234	34 aa peptide; unknown
VIT_01s0011g03420.t01_cdna_chromosome:IGGP_12x:1:3100807:3101627:-1_gene:VIT_01s0011g03420_gene_biotype:protein_coding_transcript_biotype:protein_coding_description:Putative_uncharacterized_protein__[Source:TniProtKB/TrEMBL;Acc:A5C7N0]:493	D2(-) NC_012013.3_Vitis_vinifera_cultivar_PN40024_chromosome_7,_12X,_whole_genome_shotgun_sequence_40_100(-)	VIT_01s0011g03420.t01_cdna_chromosome:IGGP_12x:1:3100807:3101627:-1_gene:VIT_01s0011g03420_gene_biotype:protein_coding_transcript_biotype:protein_coding_description:Putative_uncharacterized_protein__[Source:TniProtKB/TrEMBL;Acc:A5C7N0]	482	502	493	-37.7	-30.9	0.819629	6	3-20,500-483	1-2,502-501[UP5];21-21,482-482[UP3]	.((((((((((((((((((..&..)))))))))))))))))).	ACUCAGUGAGUUUUGGGGUUU&AUGCUCCAAAACUCACUGAGC	3	0.00644738	At1g13360-like; unknown
VIT_07s0104g01320.t01_cdna_chromosome:IGGP_12x:7:2351619:2357500:1_gene:VIT_07s0104g01320_gene_biotype:protein_coding_transcript_biotype:protein_coding_description:Putative_uncharacterized_protein__[Source:TniProtKB/TrEMBL;Acc:F6HQ17]:1569	D3(-) self NC_012013.3_Vitis_vinifera_cultivar_PN40024_chromosome_7,_12X,_whole_genome_shotgun_sequence_40_121(-)	VIT_07s0104g01320.t01_cdna_chromosome:IGGP_12x:7:2351619:2357500:1_gene:VIT_07s0104g01320_gene_biotype:protein_coding_transcript_biotype:protein_coding_description:Putative_uncharacterized_protein__[Source:TniProtKB/TrEMBL;Acc:F6HQ17]	1558	1578	1569	-35.9	-37.3	1	0	1-21,1578-1558	NA	(((((((((((((((((((((&)))))))))))))))))))))	GUAAGCUGUUAGGUCAGAAGA&UCUUCUGACCUAACAGCUUAC	3	0.0032289	self
VIT_00s0475g00020.t01_cdna_chromosome:IGGP_12x:Tn:29964973:29968208:1_gene:VIT_00s0475g00020_gene_biotype:protein_coding_transcript_biotype:protein_coding_description:Putative_uncharacterized_protein__[Source:TniProtKB/TrEMBL;Acc:D7T5S6]:1465	D3(-) NC_012013.3_Vitis_vinifera_cultivar_PN40024_chromosome_7,_12X,_whole_genome_shotgun_sequence_40_121(-)	VIT_00s0475g00020.t01_cdna_chromosome:IGGP_12x:Tn:29964973:29968208:1_gene:VIT_00s0475g00020_gene_biotype:protein_coding_transcript_biotype:protein_coding_description:Putative_uncharacterized_protein__[Source:TniProtKB/TrEMBL;Acc:D7T5S6]	1456	1474	1465	-35.9	-24.3	0.67688	6.5	1-6,1474-1469;8-12,1467-1463;15-21,1462-1456	7-7,1468-1468[SIL];13-14,x-x[BULq]	(((((((--(((((.((((((&)))))).)))))..)))))))	GUGAGCU--UAGGUGGGAGGA&UCUUCUGACCUAACAGCUUAC	1	0.0266397	Znf_RING/FYVE/PHD
VIT_10s0003g04890.t01_cdna_chromosome:IGGP_12x:10:8772052:8772588:1_gene:VIT_10s0003g04890_gene_biotype:protein_coding_transcript_biotype:protein_coding_description:Putative_uncharacterized_protein__[Source:TniProtKB/TrEMBL;Acc:D7TKJ4]:43	D3(-) NC_012013.3_Vitis_vinifera_cultivar_PN40024_chromosome_7,_12X,_whole_genome_shotgun_sequence_40_121(-)	VIT_10s0003g04890.t01_cdna_chromosome:IGGP_12x:10:8772052:8772588:1_gene:VIT_10s0003g04890_gene_biotype:protein_coding_transcript_biotype:protein_coding_description:Putative_uncharacterized_protein__[Source:TniProtKB/TrEMBL;Acc:D7TKJ4]	32	53	43	-35.9	-29.2	0.81337	6	1-7,53-47;8-19,45-34	x-x,46-46[BULt];20-21,33-32[UP3]	..((((((((((((.(((((((&)))))))-))))))))))))..	GGAAGCUGUUGGGUCCAGAGGA&UCUUCUG-ACCUAACAGCUUAC	4	0.0439107	strictosidine synthase activity/6-blade_b-propeller_TolB-like
VIT_14s0030g01240.t01_cdna_chromosome:IGGP_12x:14:5731297:5735020:1_gene:VIT_14s0030g01240_gene_biotype:protein_coding_transcript_biotype:protein_coding_description:Putative_uncharacterized_protein__[Source:TniProtKB/TrEMBL;Acc:F6HTW6]:760	D7(+) NC_012013.3_Vitis_vinifera_cultivar_PN40024_chromosome_7,_12X,_whole_genome_shotgun_sequence_40_207(+)	VIT_14s0030g01240.t01_cdna_chromosome:IGGP_12x:14:5731297:5735020:1_gene:VIT_14s0030g01240_gene_biotype:protein_coding_transcript_biotype:protein_coding_description:Putative_uncharacterized_protein__[Source:TniProtKB/TrEMBL;Acc:F6HTW6]	750	769	760	-34.3	-30.4	0.886297	2	1-16,769-754;18-21,753-750	17-17,x-x[BULq]	((((-((((((((((((((((&)))))))))))))))).))))	UGUG-AAGGCUUCUCCACUGA&UCAGUGGAGAAGCUUUACAUA	4	0.0148565	miR393 target TIR1-L VIT_14s0030g01240; two hit
VIT_01s0137g00430.t01_cdna_chromosome:IGGP_12x:1:6955265:6957995:-1_gene:VIT_01s0137g00430_gene_biotype:protein_coding_transcript_biotype:protein_coding_description:Putative_uncharacterized_protein__[Source:TniProtKB/TrEMBL;Acc:F6GVP0]:1040	D8(+) NC_012013.3_Vitis_vinifera_cultivar_PN40024_chromosome_7,_12X,_whole_genome_shotgun_sequence_40_228(+)	VIT_01s0137g00430.t01_cdna_chromosome:IGGP_12x:1:6955265:6957995:-1_gene:VIT_01s0137g00430_gene_biotype:protein_coding_transcript_biotype:protein_coding_description:Putative_uncharacterized_protein__[Source:TniProtKB/TrEMBL;Acc:F6GVP0]	1029	1049	1040	-39	-29.3	0.751282	8	3-5,1047-1045;7-21,1043-1029	1-2,1049-1048[UP5];6-6,1044-1044[SIL]	(((((((((((((((.(((..&..))).)))))))))))))))	UGGCCUGGCAGCUGAACUGGA&UAUAGAUCAGUUGCUGGGCCA	2	0.0437683	glycosyl hydrolase5 cellulaseA
VIT_19s0014g02860.t01_cdna_chromosome:IGGP_12x:19:2951996:2954550:-1_gene:VIT_19s0014g02860_gene_biotype:protein_coding_transcript_biotype:protein_coding_description:Putative_uncharacterized_protein__[Source:TniProtKB/TrEMBL;Acc:F6H253]:981	D8(+) NC_012013.3_Vitis_vinifera_cultivar_PN40024_chromosome_7,_12X,_whole_genome_shotgun_sequence_40_228(+)	VIT_19s0014g02860.t01_cdna_chromosome:IGGP_12x:19:2951996:2954550:-1_gene:VIT_19s0014g02860_gene_biotype:protein_coding_transcript_biotype:protein_coding_description:Putative_uncharacterized_protein__[Source:TniProtKB/TrEMBL;Acc:F6H253]	970	990	981	-39	-29.3	0.751282	8	3-5,988-986;7-21,984-970	1-2,990-989[UP5];6-6,985-985[SIL]	(((((((((((((((.(((..&..))).)))))))))))))))	UGGCCUGGCAGCUGAACUGGA&UAUAGAUCAGUUGCUGGGCCA	2	0.0619348	Glycoside_hydrolase5/cellulase A
VIT_00s2085g00010.t01_cdna_chromosome:IGGP_12x:Tn:41029283:41031611:-1_gene:VIT_00s2085g00010_gene_biotype:protein_coding_transcript_biotype:protein_coding_description:Putative_uncharacterized_protein__[Source:TniProtKB/TrEMBL;Acc:D7SZ83]:1557	D12(+) NC_012013.3_Vitis_vinifera_cultivar_PN40024_chromosome_7,_12X,_whole_genome_shotgun_sequence_40_312(+)	VIT_00s2085g00010.t01_cdna_chromosome:IGGP_12x:Tn:41029283:41031611:-1_gene:VIT_00s2085g00010_gene_biotype:protein_coding_transcript_biotype:protein_coding_description:Putative_uncharacterized_protein__[Source:TniProtKB/TrEMBL;Acc:D7SZ83]	1545	1566	1557	-42.7	-28.6	0.669789	6.5	1-2,1566-1565;5-18,1562-1549;19-21,1547-1545	3-4,1564-1563[SIL];x-x,1548-1548[BULt]	(((.((((((((((((((..((&))..))))))))))))))-)))	GGGACAGUUCUUCUUGAGUUGG&UCUCCUCAGGAAGAACUG-CCC	1	0.0280987	LRR-kinase-like
VIT_15s0024g00700.t01_cdna_chromosome:IGGP_12x:15:1168076:1187431:-1_gene:VIT_15s0024g00700_gene_biotype:protein_coding_transcript_biotype:protein_coding_gene_symbol:ATKRS-1_description:Lysine--tRNA_ligase__[Source:TniProtKB/TrEMBL;Acc:F6I5G4]:1594	D12(+) NC_012013.3_Vitis_vinifera_cultivar_PN40024_chromosome_7,_12X,_whole_genome_shotgun_sequence_40_312(+)	VIT_15s0024g00700.t01_cdna_chromosome:IGGP_12x:15:1168076:1187431:-1_gene:VIT_15s0024g00700_gene_biotype:protein_coding_transcript_biotype:protein_coding_gene_symbol:ATKRS-1_description:Lysine--tRNA_ligase__[Source:TniProtKB/TrEMBL;Acc:F6I5G4]	1585	1603	1594	-42.7	-30	0.702576	3.5	1-14,1603-1590;17-21,1589-1585	15-16,x-x[BULq]	(((((--((((((((((((((&))))))))))))))..)))))	GGGCA--UUUUCUUGAGGAGA&UCUCCUCAGGAAGAACUGCCC	2	0.147719	Lysine--tRNA ligase
NC_012020.3_Vitis_vinifera_cultivar_PN40024_chromosome_14,_12X,_whole_genome_shotgun_sequence_368_1:82	vvi-MIR393a_Cluster_31361_NC_012022.3_Vitis_vinifera_cultivar_PN40024_chromosome_16,_12X,_whole_genome_shotgun_sequence:17247181-17247375	TIR1-like VIT_14s0068g01330. NC_012020.3_Vitis_vinifera_cultivar_PN40024_chromosome_14,_12X,_whole_genome_shotgun_sequence_368_1	69	91	82	-39.1	-34.9	0.892583	2	1-18,91-74;20-22,71-69	19-19,73-72[AILt]	(((..((((((((((((((((((&))))))))))))))))))-.)))	UGAGACAAUGCGAUCCCUUUGGA&UCCAAAGGGAUCGCAUUG-AUCA	2	0.0034484
NC_012020.3_Vitis_vinifera_cultivar_PN40024_chromosome_14,_12X,_whole_genome_shotgun_sequence_86_1:82	vvi-MIR393a_Cluster_31361_NC_012022.3_Vitis_vinifera_cultivar_PN40024_chromosome_16,_12X,_whole_genome_shotgun_sequence:17247181-17247375	TIR1-like VIT_14s0030g01240. NC_012020.3_Vitis_vinifera_cultivar_PN40024_chromosome_14,_12X,_whole_genome_shotgun_sequence_86_1	71	91	82	-39.1	-34.5	0.882353	2	1-18,91-74;20-21,73-72	19-19,x-x[BULq];22-22,71-71[UP3]	.((-((((((((((((((((((&)))))))))))))))))).)).	AGA-CAAUGCGAUCCCUUUGGA&UCCAAAGGGAUCGCAUUGAUCA	2	0.0103096
VIT_19s0090g01310.t01_cdna_chromosome:IGGP_12x:19:7379075:7386285:1_gene:VIT_19s0090g01310_gene_biotype:protein_coding_transcript_biotype:protein_coding_gene_symbol:TAF6B4_description:Putative_uncharacterized_protein__[Source:TniProtKB/TrEMBL;Acc:F6HET9]:1554	D5(+) NC_012020.3_Vitis_vinifera_cultivar_PN40024_chromosome_14,_12X,_whole_genome_shotgun_sequence_86_165(+)	VIT_19s0090g01310.t01_cdna_chromosome:IGGP_12x:19:7379075:7386285:1_gene:VIT_19s0090g01310_gene_biotype:protein_coding_transcript_biotype:protein_coding_gene_symbol:TAF6B4_description:Putative_uncharacterized_protein__[Source:TniProtKB/TrEMBL;Acc:F6HET9]	1543	1563	1554	-38.5	-28.6	0.742857	6	1-6,1563-1558;8-11,1556-1553;14-21,1550-1543	7-7,1557-1557[SIL];12-13,1552-1551[SIL]	((((((((..((((.((((((&)))))).))))..))))))))	AGGAUGUCAAUGCUGGGCAAU&AUUGCUGAGCAAGGACAUCCU	4	0.189052	TFIID factor, AtTAF6-like
other triggers found by PhaseTank but not described
VIT_12s0059g01410.t01_cdna_chromosome:IGGP_12x:12:6340188:6340705:1_gene:VIT_12s0059g01410_gene_biotype:protein_coding_transcript_biotype:protein_coding_description:Putative_uncharacterized_protein__[Source:TniProtKB/TrEMBL;Acc:F6HIF2]:221	self NC_012018.3_Vitis_vinifera_cultivar_PN40024_chromosome_12,_12X,_whole_genome_shotgun_sequence_96_79(-)	VIT_12s0059g01410.t01_cdna_chromosome:IGGP_12x:12:6340188:6340705:1_gene:VIT_12s0059g01410_gene_biotype:protein_coding_transcript_biotype:protein_coding_description:Putative_uncharacterized_protein__[Source:TniProtKB/TrEMBL;Acc:F6HIF2]	210	230	221	-36	-37.1	1	0	1-21,230-210	NA	(((((((((((((((((((((&)))))))))))))))))))))	CUCCUGAGCUUAGUCUUCUUA&UAAGAAGACUAAGCUCAGGAG	2	0.00637318

## Sheet: PT prediction table
PhaseTank TAS miRNA/phasi-RNA trigger predictions.
#filerowNO	ID	Beg:End	Length	Phased_Ratio	Phased_Abundance	Phased_Number	Phased_Score	annot	Triggered_miRNA
Supplemental Table S3a.
25	NC_012019.3_Vitis_vinifera_cultivar_PN40024_chromosome_13,_12X,_whole_genome_shotgun_sequence_229	15496886:15497319	434	0.535	7335	12	57.152	TAS11. Significantly up-regulated by UV. D3- targets chr18 LRR VIT_18s0001g07270 which produces siRNA D27(+) to allen5.5, degrad3, p=0.05 65% homol to VTE3/AT3G63410 SAM-dependent_MTases, chloroplast inner envelope. VIT_05s0020g04430. D3+ siRNA 1358 abund--> allen8.5, degrad2 p=0.04 EF_Hand_1_Ca_BS VIT_18s0001g10620; D4-. 155 abund. allen7, degrad4, p=0.03 Polyketide_cyclase/dehydratase START dom…	vvi-MIR482_Cluster_32524_NC_012023.3_Vitis_vinifera_cultivar_PN40024_chromosome_17,_12X,_whole_genome_shotgun_sequence:5522830-5523995
12	NC_012024.3_Vitis_vinifera_cultivar_PN40024_chromosome_18,_12X,_whole_genome_shotgun_sequence_68	5499758:5500527	770	0.627	1220	21	93.506	VIT_18s0001g07270 coding. NB-ARC, 71 paralogues.	NC_012019.3_Vitis_vinifera_cultivar_PN40024_chromosome_13,_12X,_whole_genome_shotgun_sequence_229_705(+) [D3(-)]
64	NC_012019.3_Vitis_vinifera_cultivar_PN40024_chromosome_13,_12X,_whole_genome_shotgun_sequence_127	9275368:9275654	287	0.832	1101	5	29.153	VIT_13s0106g00020 coding. NB-ARC, 71 paralogues	NC_012019.3_Vitis_vinifera_cultivar_PN40024_chromosome_13,_12X,_whole_genome_shotgun_sequence_229_705(+) [D3(-)]
Supplemental Table S3b.
174	NC_012018.3_Vitis_vinifera_cultivar_PN40024_chromosome_12,_12X,_whole_genome_shotgun_sequence_246	17319134:17319546	413	0.688	22	4	8.5	VIT12s0034g01310 ~ 900 nt downstream of 3' utr. Encodes LRR w 25 paralogues.	NC_012024.3_Vitis_vinifera_cultivar_PN40024_chromosome_18,_12X,_whole_genome_shotgun_sequence_229_186(+) [D6(+)]
165	NC_012018.3_Vitis_vinifera_cultivar_PN40024_chromosome_12,_12X,_whole_genome_shotgun_sequence_247	17339742:17340154	413	0.733	22	4	9.067	VIT_12s0034g01350 coding. LRR, 23 paralogues	NC_012024.3_Vitis_vinifera_cultivar_PN40024_chromosome_18,_12X,_whole_genome_shotgun_sequence_229_186(+) [D6(+)]
77	NC_012008.3_Vitis_vinifera_cultivar_PN40024_chromosome_2,_12X,_whole_genome_shotgun_sequence_252	18716780:18717066	287	0.899	923	4	24.544	big EST cluster across spp, but not annotated. 7 kb upstream of VIT_02s0087g00980. BLASTN NCBI RNA-ref gives 25S rRNA from S. lycopersicum	NC_012024.3_Vitis_vinifera_cultivar_PN40024_chromosome_18,_12X,_whole_genome_shotgun_sequence_229_186(+) [D6(+)]
16	NC_012024.3_Vitis_vinifera_cultivar_PN40024_chromosome_18,_12X,_whole_genome_shotgun_sequence_229	20665102:20666018	917	0.404	4327	23	77.718	possible TAS locus; VIT_18s0072g01090 coding and 3' UTR. Encodes transmembrane helix containing protein. Prior result from running PHASETANK on cDNAs (for tuning): "Another 83 aa peptide with transmembrane domain- Related to VIT_19s0085g00460/VIT_19s0085g00480? Should align them." See also VIT19s0085g00400 and 430, above	NC_012024.3_Vitis_vinifera_cultivar_PN40024_chromosome_18,_12X,_whole_genome_shotgun_sequence_229_709(-)"vvi-MIR482_Cluster_32524_NC_012023.3_Vitis_vinifera_cultivar_PN40024_chromosome_17,_12X,_whole_genome_shotgun_sequence:5522830-5523995"NC_012024.3_Vitis_vinifera_cultivar_PN40024_chromosome_18,_12X,_whole_genome_shotgun_sequence_229_459(+)
Supplemental Table S3c.
2	NC_012020.3_Vitis_vinifera_cultivar_PN40024_chromosome_14,_12X,_whole_genome_shotgun_sequence_126	7643209:7643768	560	0.966	5482	21	174.703	VIT_14s0081g00100 ~300 nt downstream of grape EST encoding 57 aa peptide.	vvi-miR7122_Cluster_8708_NC_012011.3_Vitis_vinifera_cultivar_PN40024_chromosome_5,_12X,_whole_genome_shotgun_sequence:6820608-6821071
3	NC_012020.3_Vitis_vinifera_cultivar_PN40024_chromosome_14,_12X,_whole_genome_shotgun_sequence_332	21607775:21608145	371	0.981	191471	14	167.053	TAS4a. VIT_14s0006g03100. TAS4a overlaps with 3' end of gene. phasiRNAs: NC_012020.3_Vitis_vinifera_cultivar_PN40024_chromosome_14,_12X,_whole_genome_shotgun_sequence_332. D4(-)=phasetank-143(-) targets: VIT_01s0010g03620 =LHCA2. VIT_14s0006g03100=59aa signal peptide. VIT_16s0022g00630 = ct coiled coil transmembrane prot PAM68.	vvi-MIR828_Cluster_31813_NC_012022.3_Vitis_vinifera_cultivar_PN40024_chromosome_16,_12X,_whole_genome_shotgun_sequence:21724236-21724615
45	NC_012015.3_Vitis_vinifera_cultivar_PN40024_chromosome_9,_12X,_whole_genome_shotgun_sequence_12	1162353:1162618	266	0.977	1828	5	36.686	VIT_09s0002g01380. Pantaleo (2010) 1200 degradome reads	vvi-MIR828_Cluster_31813_NC_012022.3_Vitis_vinifera_cultivar_PN40024_chromosome_16,_12X,_whole_genome_shotgun_sequence:21724236-21724615
Supplemental Table S3d.
33	NC_012019.3_Vitis_vinifera_cultivar_PN40024_chromosome_13,_12X,_whole_genome_shotgun_sequence_342	21550530:21551089	560	0.695	761	10	46.088	possible TAS locus but siRNAs have no good targets	vvi-MIR482_Cluster_32524_NC_012023.3_Vitis_vinifera_cultivar_PN40024_chromosome_17,_12X,_whole_genome_shotgun_sequence:5522830-5523995
3	NC_012020.3_Vitis_vinifera_cultivar_PN40024_chromosome_14,_12X,_whole_genome_shotgun_sequence_332	21607775:21608145	371	0.981	191471	14	167.053	TAS4a. VIT_14s0006g03100. TAS4a overlaps with 3' end of gene. phasiRNAs: NC_012020.3_Vitis_vinifera_cultivar_PN40024_chromosome_14,_12X,_whole_genome_shotgun_sequence_332.	vvi-MIR828_Cluster_31813_NC_012022.3_Vitis_vinifera_cultivar_PN40024_chromosome_16,_12X,_whole_genome_shotgun_sequence:21724236-21724615
4	NC_012020.3_Vitis_vinifera_cultivar_PN40024_chromosome_14,_12X,_whole_genome_shotgun_sequence_331	21534509:21534963	455	0.995	97364	11	125.755	TAS4b	MYBA7 as D4(-) target found in Cascade output
7	NC_012007.3_Vitis_vinifera_cultivar_PN40024_chromosome_1,_12X,_whole_genome_shotgun_sequence_54	2961251:2961747	497	0.958	7643	14	119.948	TAS4c	vvi-MIR828_Cluster_31813_NC_012022.3_Vitis_vinifera_cultivar_PN40024_chromosome_16,_12X,_whole_genome_shotgun_sequence:21724236-21724615
17	NC_012020.3_Vitis_vinifera_cultivar_PN40024_chromosome_14,_12X,_whole_genome_shotgun_sequence_397	27708167:27708642	476	0.976	5056	9	74.901	MYB156_Pantaleo5669 VIT_14s0066g01220. miR828 trigger.	Pantaleo (2010) degradome miR828 trigger verified
114	NC_012011.3_Vitis_vinifera_cultivar_PN40024_chromosome_5,_12X,_whole_genome_shotgun_sequence_129	9730573:9730964	392	0.635	111	6	17.941	trigger is TAS4a D10(-). VIT_05s0049g02100 ~ 3kb downstream in intergenic region. Encodes CXC domain Polycomb group (Pc-G) protein, like CURLY LEAF, MEDEA, EZA1. phasiRNAs produced have no good targets. Didn't find in Shortstack_98output	NC_012020.3_Vitis_vinifera_cultivar_PN40024_chromosome_14,_12X,_whole_genome_shotgun_sequence_332_269(-)
8	NC_012013.3_Vitis_vinifera_cultivar_PN40024_chromosome_7,_12X,_whole_genome_shotgun_sequence_40	2354767:2355347	581	0.703	3893	20	116.266	TIR1-like. VIT_07s0104g01320. allen0, degrad3, p=0.003	vvi-MIR393a_Cluster_31361_NC_012022.3_Vitis_vinifera_cultivar_PN40024_chromosome_16,_12X,_whole_genome_shotgun_sequence:17247181-17247375
20	NC_012020.3_Vitis_vinifera_cultivar_PN40024_chromosome_14,_12X,_whole_genome_shotgun_sequence_86	5734480:5735060	581	0.568	567	18	64.836	TIR1-like. VIT_14s0030g01240. D7+ from VIT_07s0104g01320 TIR1-like also targeted by miR393 gives allen2 degrad4 p=0.01 signal. Likely two hit case	vvi-MIR393a_Cluster_31361_NC_012022.3_Vitis_vinifera_cultivar_PN40024_chromosome_16,_12X,_whole_genome_shotgun_sequence:17247181-17247375
37	NC_012020.3_Vitis_vinifera_cultivar_PN40024_chromosome_14,_12X,_whole_genome_shotgun_sequence_368	25059817:25060229	413	0.873	446	8	42.591	TIR1-like LRR F-box VIT_14s0068g01330.	vvi-MIR393a_Cluster_31361_NC_012022.3_Vitis_vinifera_cultivar_PN40024_chromosome_16,_12X,_whole_genome_shotgun_sequence:17247181-17247375
others found by PhaseTank but not described
113	NC_012007.3_Vitis_vinifera_cultivar_PN40024_chromosome_1,_12X,_whole_genome_shotgun_sequence_171	13931169:13931539	371	0.578	539	5	18.192	VIT_01s0113g00560 downstream ~5 kb from 3' UTR. Clusters found in monocots and dicots	vvi-MIR2111_Cluster_15467_NC_012014.3_Vitis_vinifera_cultivar_PN40024_chromosome_8,_12X,_whole_genome_shotgun_sequence:15368658-15368754
78	NC_012018.3_Vitis_vinifera_cultivar_PN40024_chromosome_12,_12X,_whole_genome_shotgun_sequence_96	6340319:6340647	329	0.342	2490	9	24.102	VIT_12s0059g01410 coding, 66aa signal pepide. Allen score 0, degradome 2, pval=0.006.	vvi-MIR390_Cluster_11075_NC_012012.3_Vitis_vinifera_cultivar_PN40024_chromosome_6,_12X,_whole_genome_shotgun_sequence:8159522-8159649
